# Supplementary material for: Controlled synthesis of copper telluride nanostructures for long-cycling anodes in lithium ion batteries
Source: Royal Society of Chemistry journal article supplement (doi:10.1039/c4ta01579g), 2014-05-14
Supplement: c4ta01579g1.pdf [file c4ta01579g1.pdf]

## Supporting Information

# Controlled-Synthesis of Copper Telluride Nanostructures for Long-cycling Anodes in Lithium Ion Batteries

Chao Han, Zhen Li\*, Wei-jie Li, Shu-lei Chou, Shi-xue Dou

Institute for Superconducting and Electronic Materials, Australian Institute for Innovative Materials, University of Wollongong, Squires Way, North Wollongong, NSW 2500, Australia.

\*To whom correspondence should be addressed. E-mail: zhenl@uow.edu.au.

### Contents

|                                                                                                                                                                                                                                                                            |    |
|----------------------------------------------------------------------------------------------------------------------------------------------------------------------------------------------------------------------------------------------------------------------------|----|
| <b>1. Figures</b> .....                                                                                                                                                                                                                                                    | 3  |
| <b>Figure S1.</b> XPS spectra of Te 3d from (a) copper telluride nanocubes and (b) copper telluride nanosheets.....                                                                                                                                                        | 3  |
| <b>Figure S2</b> SEM images and size distributions of copper telluride nanocubes prepared from different reaction times: (a, d) 5min, (b, e) 6min, and (c, f) 8min. ....                                                                                                   | 4  |
| <b>Figure S3</b> SEM images and size distribution of nanostructures prepared using different CuCl concentrations at 250 °C: (a, d) 0.2 M, (b, e) 0.05 M, and (c, f) 0.01M.....                                                                                             | 5  |
| <b>Figure S4</b> (a-b) SEM images of samples prepared at 230 °C and 270 °C using 0.02 M CuCl; (c) size distribution of sample prepared at 230 °C; (d) XRD pattern of sample prepared at 270 °C. ....                                                                       | 6  |
| <b>Figure S5</b> (a) SEM image, (b) size distribution and (c) X-ray diffraction pattern of copper telluride nanocubes synthesised with a ratio of 10 (CuCl/TOPTe).....                                                                                                     | 7  |
| <b>Figure S6</b> XRD patterns of samples prepared in oleic acid, TOPO and oleylamine. ....                                                                                                                                                                                 | 8  |
| <b>Figure S7</b> SEM images and XRD patterns of nanocubes prepared by adding small amount of ligands into TOP: (a) oleylamine; (b) TOPO; (c) oleic acid.....                                                                                                               | 9  |
| <b>Figure S8</b> XRD and SEM images of samples prepared with different copper precursors. (a) XRD patterns; (b) CuBr; (c) CuCl <sub>2</sub> ; (d) CuF <sub>2</sub> ; (e) Cu(CH <sub>3</sub> COO) <sub>2</sub> ; (f) Cu(acac) <sub>2</sub> . All scale bars are 200 nm. ... | 11 |
| <b>Figure S9</b> XRD and SEM image of precipitate obtained by heating CuF <sub>2</sub> in TOP at 250 °C for 10 min. ....                                                                                                                                                   | 12 |

|                                                                                                                                                                                                                                                                                                                                                          |           |
|----------------------------------------------------------------------------------------------------------------------------------------------------------------------------------------------------------------------------------------------------------------------------------------------------------------------------------------------------------|-----------|
| <b>Figure S10</b> XRD and SEM image of product obtained by heating CuCl in oleylamine at 250 °C for 10 min. ....                                                                                                                                                                                                                                         | 13        |
| <b>Figure S11</b> Different Cu <sub>2-x</sub> Te sheet structure synthesised under different temperatures and CuCl concentrations. (a) TEM of sample synthesised with 0.02 M CuCl at 230 °C; (b) sample obtained from 0.02 M CuCl at 270 °C; (c) sample synthesised with 0.05 M CuCl at 250 °C; (d) sample synthesised with 0.005 M CuCl at 250 °C. .... | 14        |
| <b>Figure S12</b> Ex-situ XRD for Cu <sub>2-x</sub> Te electrodes stopped at different voltage plateaus: (a) voltage state of the plateaus; (b) ex-situ XRD for the 4 electrodes.....                                                                                                                                                                    | 15        |
| <b>2. Synthesis of hollowed Cu<sub>2-x</sub>Te nanoparticles. ....</b>                                                                                                                                                                                                                                                                                   | <b>16</b> |

## 1. Figures

(a)

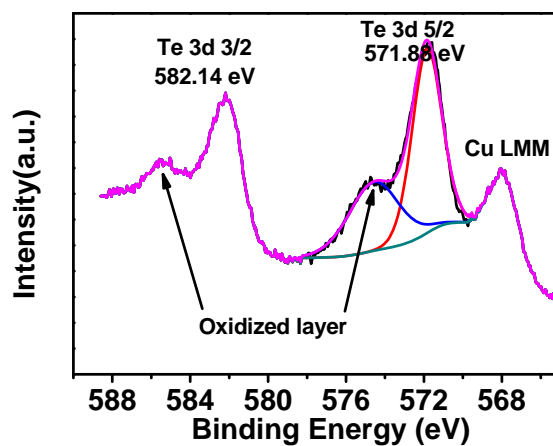

(b)

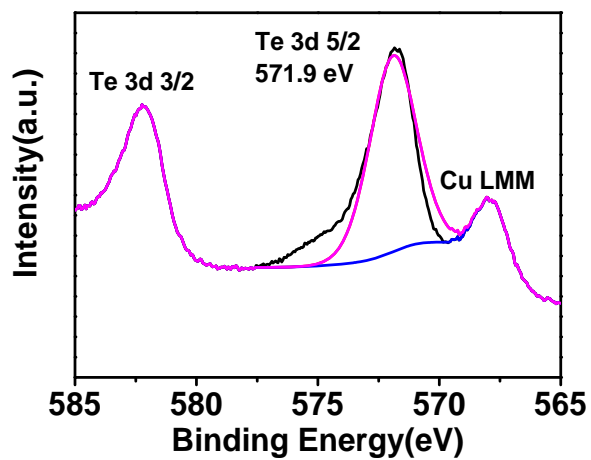

**Figure S1.** XPS spectra of Te 3d from (a) copper telluride nanocubes and (b) copper telluride nanosheets.

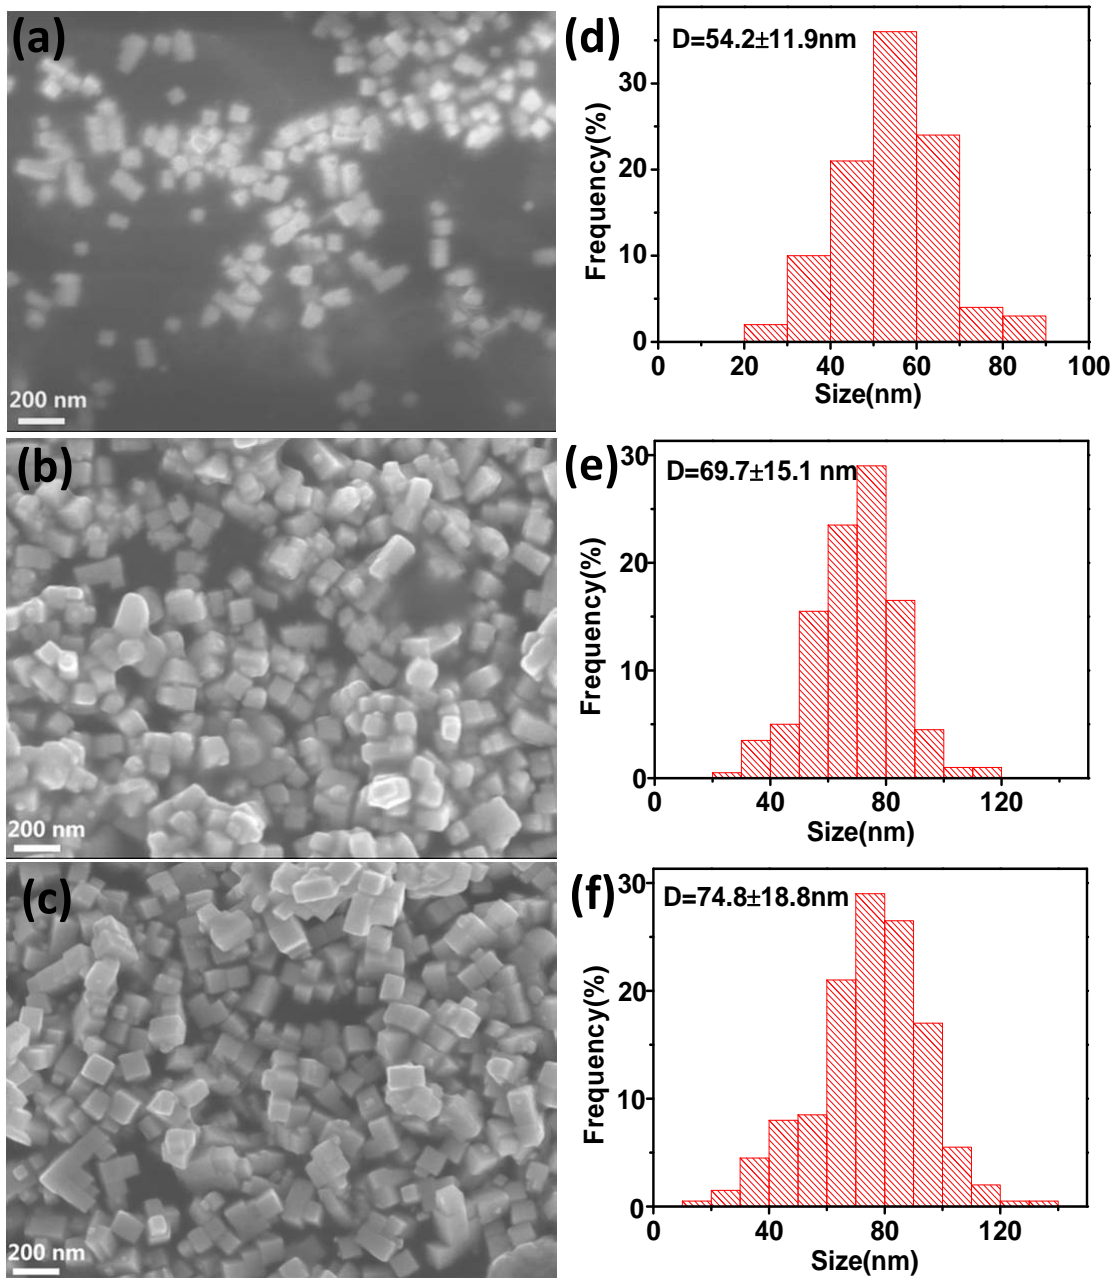

**Figure S2** SEM images and size distributions of copper telluride nanocubes prepared from different reaction times: (a, d) 5min, (b, e) 6min, and (c, f) 8min.

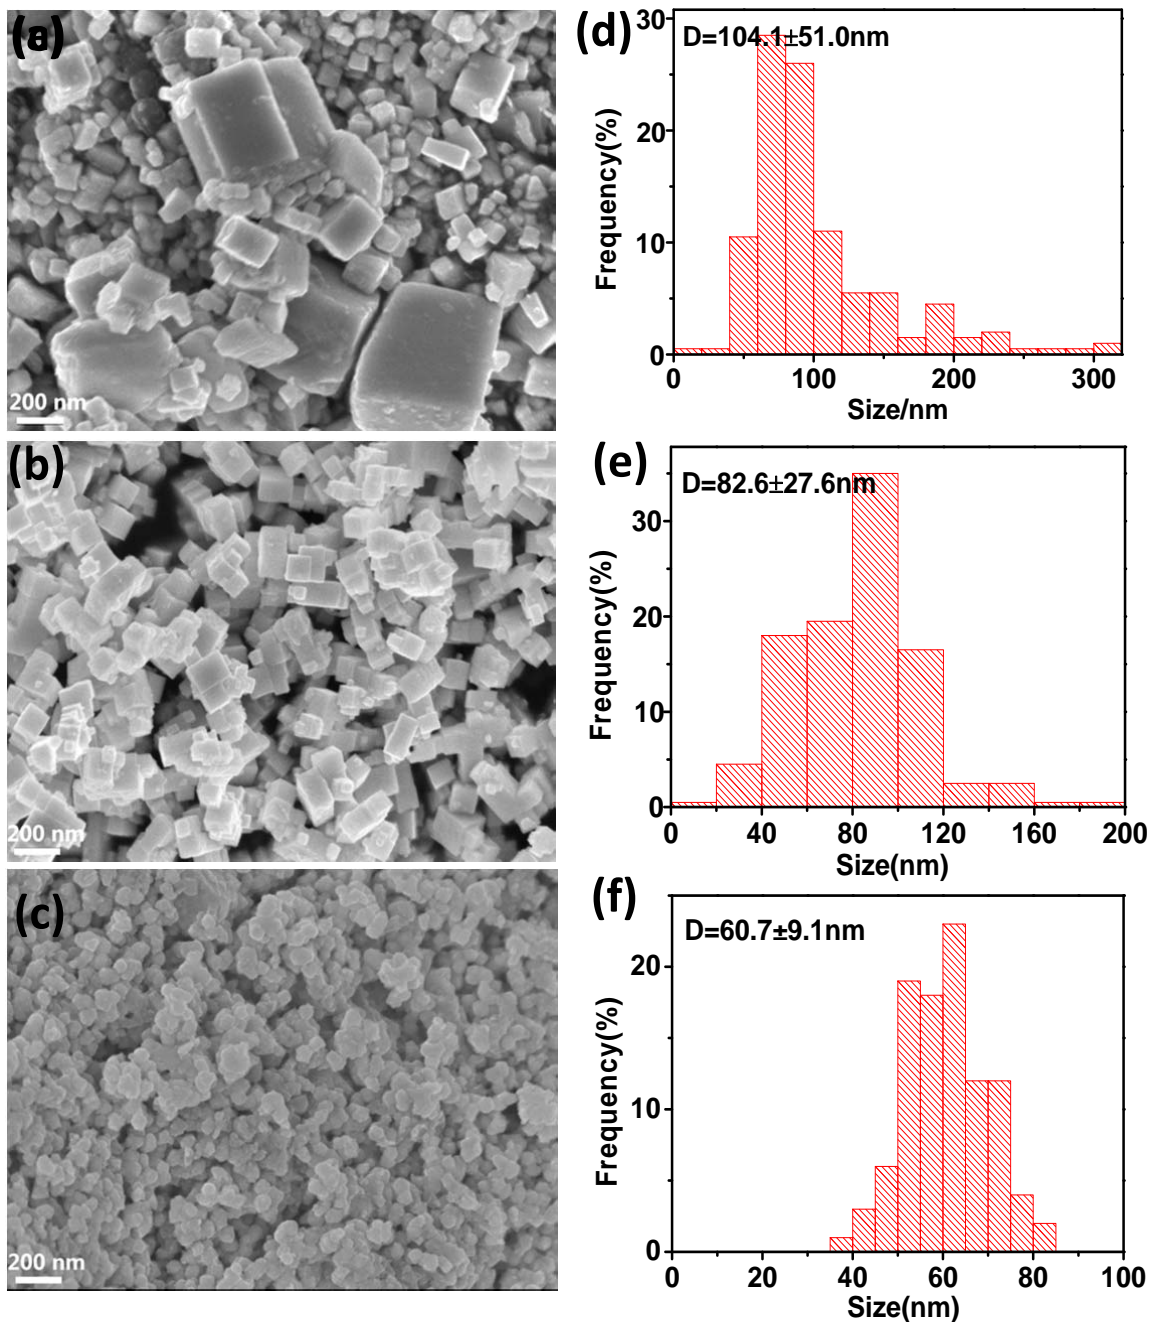

**Figure S3** SEM images and size distribution of nanostructures prepared using different CuCl concentrations at 250 °C: (a, d) 0.2 M, (b, e) 0.05 M, and (c, f) 0.01M.

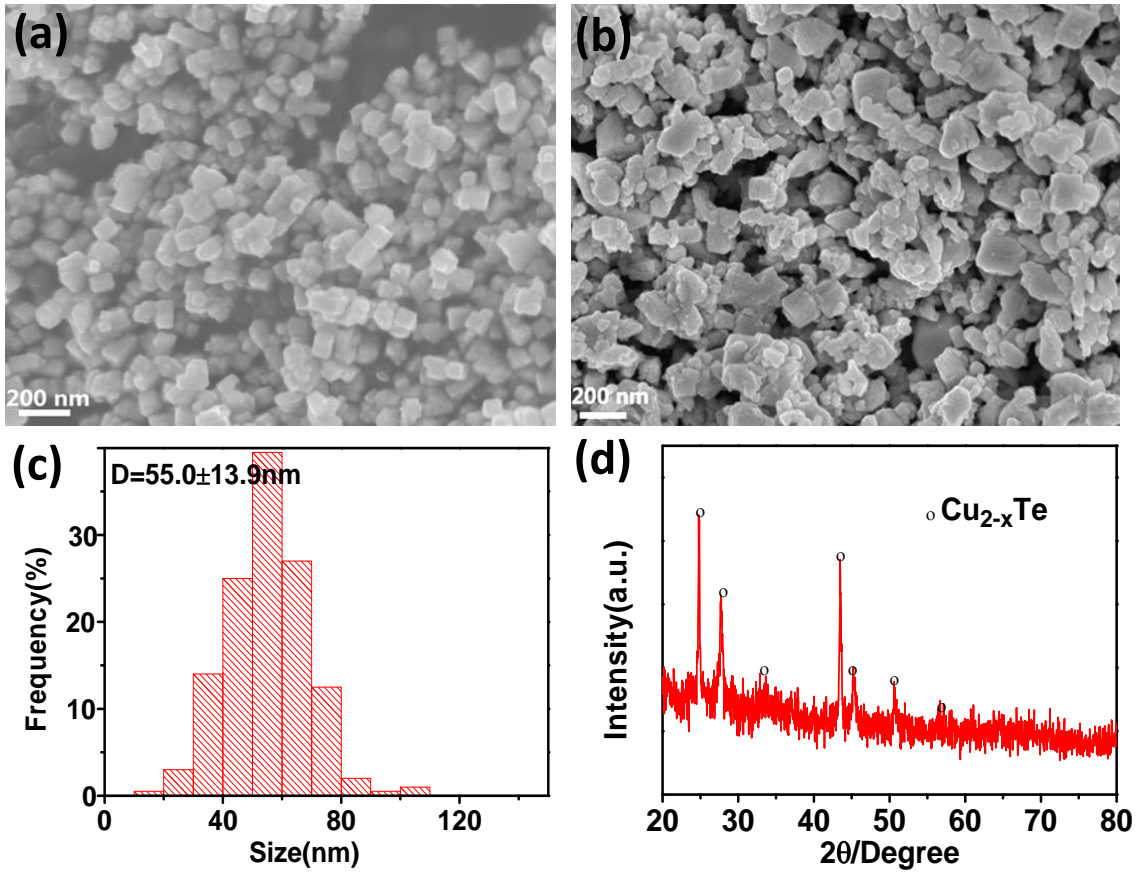

**Figure S4** (a-b) SEM images of samples prepared at 230 °C and 270 °C using 0.02 M CuCl; (c) size distribution of sample prepared at 230 °C; (d) XRD pattern of sample prepared at 270 °C.

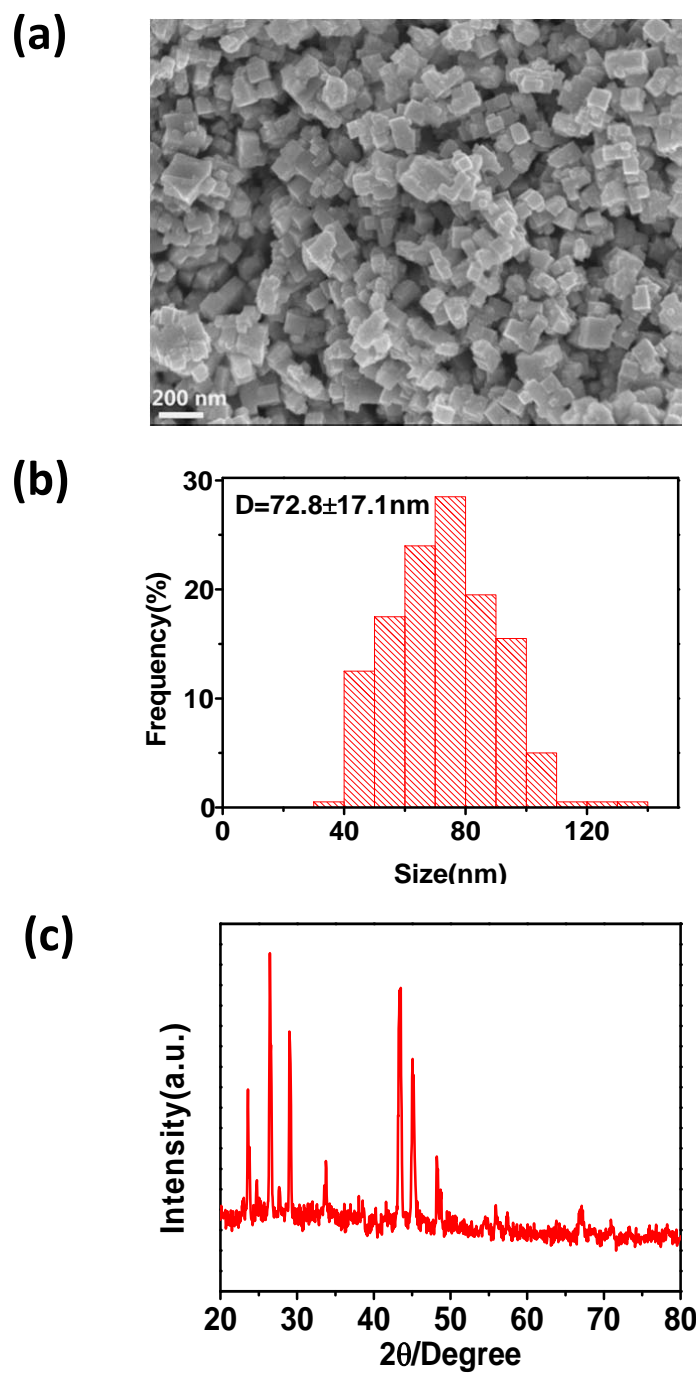

**Figure S5** (a) SEM image, (b) size distribution and (c) X-ray diffraction pattern of copper telluride nanocubes synthesised with a ratio of 10 (CuCl/TOPTe).

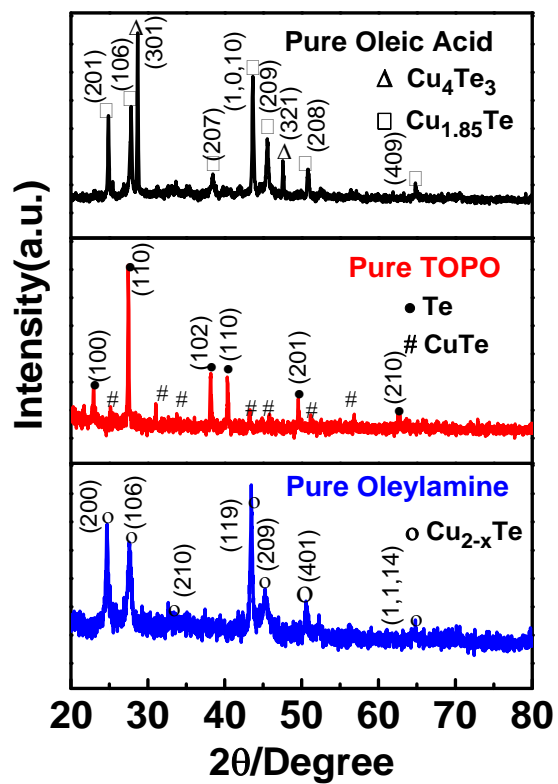

**Figure S6** XRD patterns of samples prepared in oleic acid, TOPO and oleylamine.



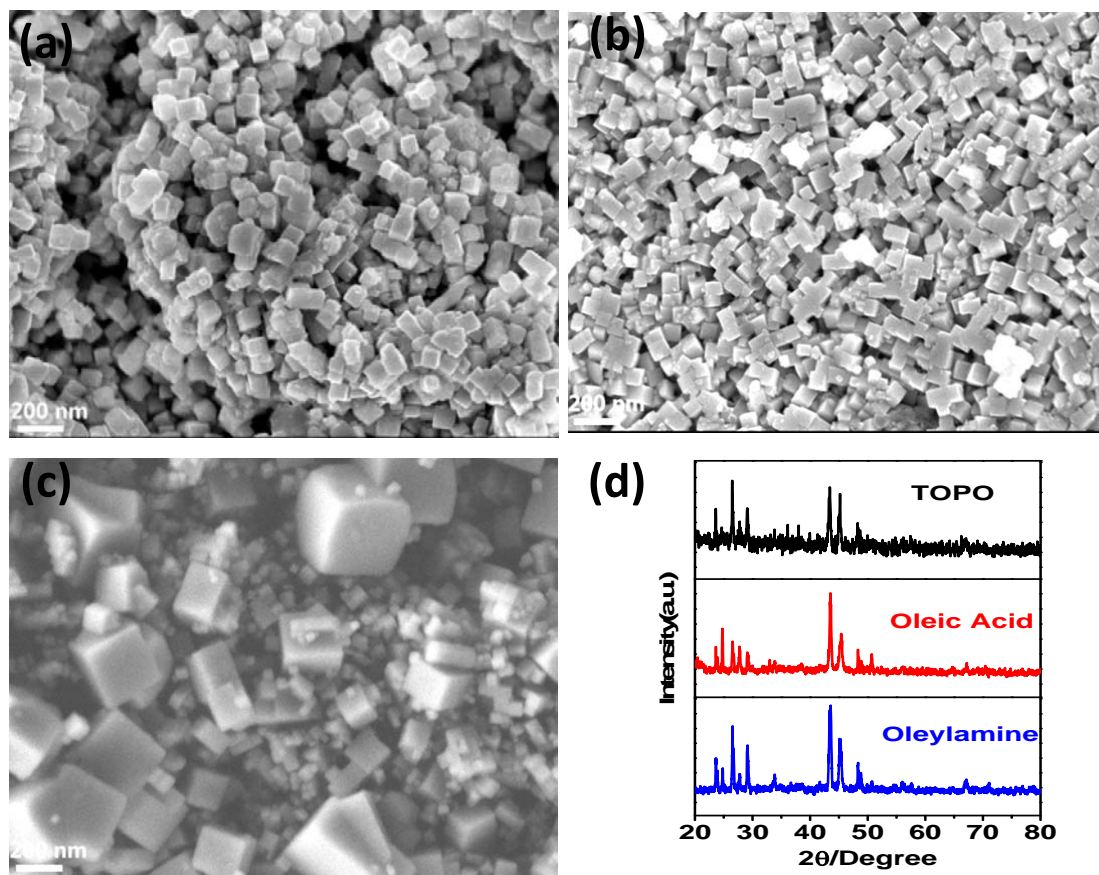

**Figure S7** SEM images and XRD patterns of nanocubes prepared by adding small amount of ligands into TOP: (a) oleylamine; (b) TOPO; (c) oleic acid.

(a)

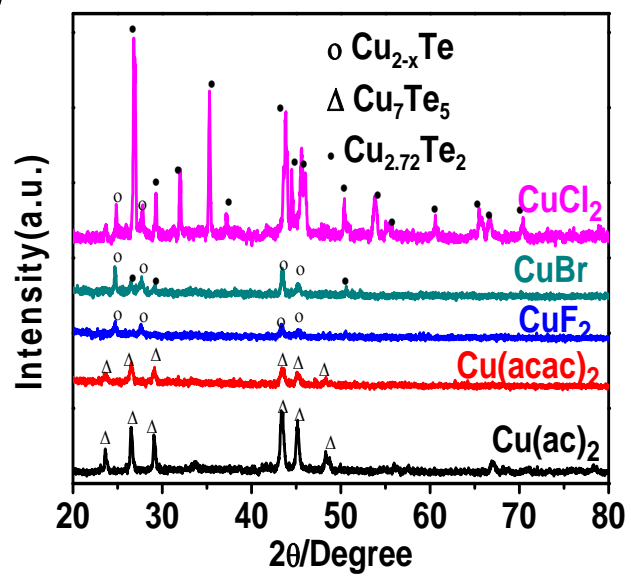

(b)

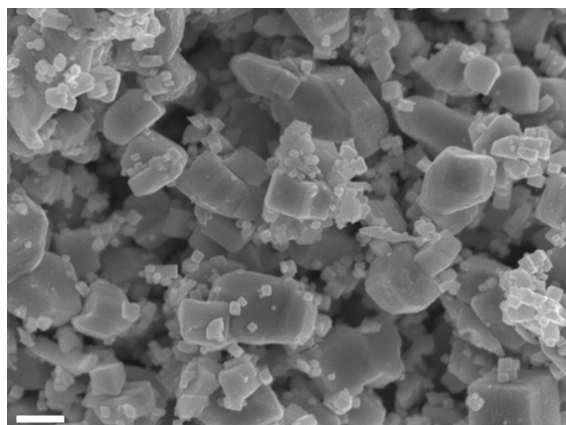

(c)

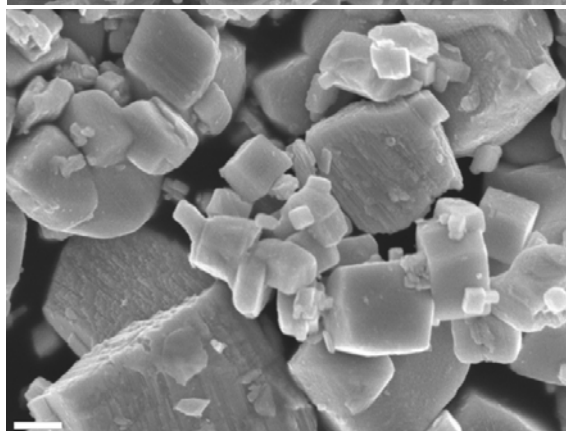

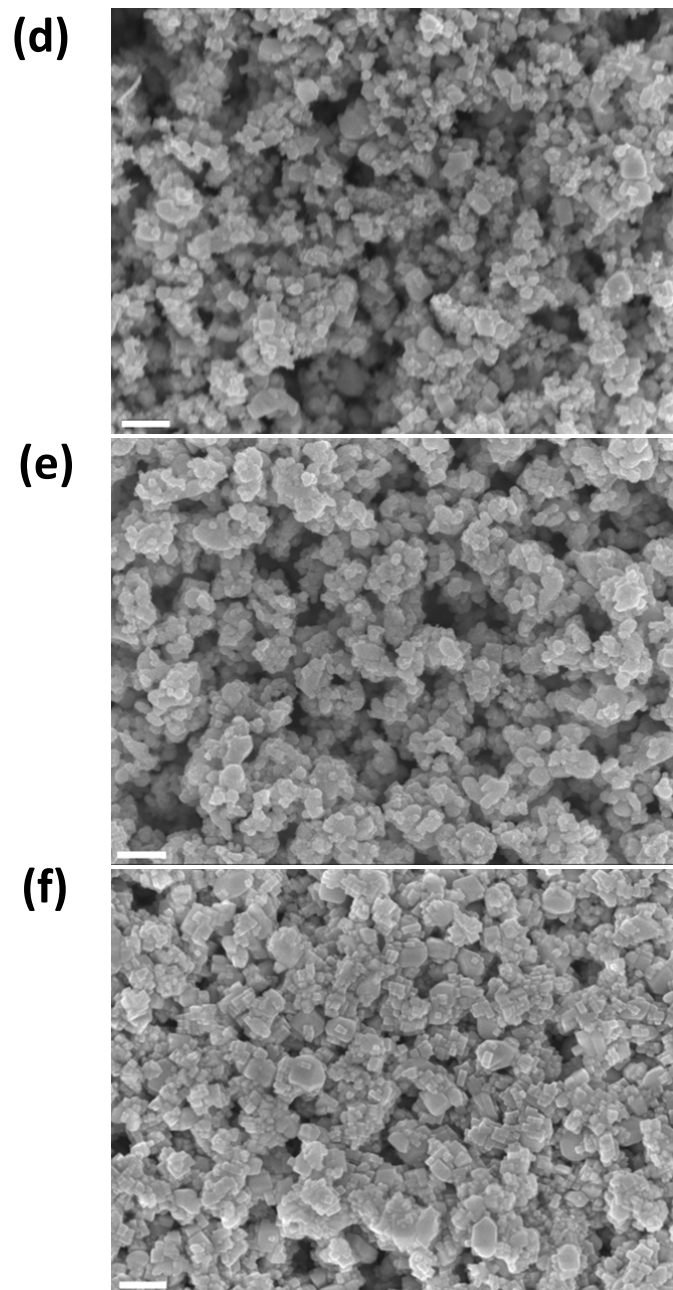

**Figure S8** XRD and SEM images of samples prepared with different copper precursors. (a) XRD patterns; (b) CuBr; (c) CuCl<sub>2</sub>; (d) CuF<sub>2</sub>; (e) Cu(CH<sub>3</sub>COO)<sub>2</sub>; (f) Cu(acac)<sub>2</sub>. All scale bars are 200 nm.

(a)

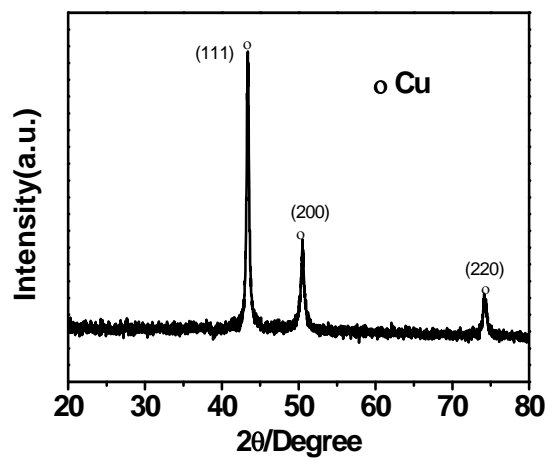

(b)

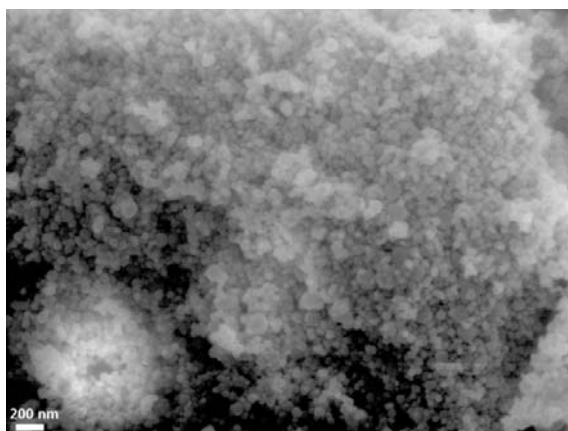

**Figure S9** XRD and SEM image of precipitate obtained by heating  $\text{CuF}_2$  in TOP at  $250\text{ }^\circ\text{C}$  for 10 min.

(a)

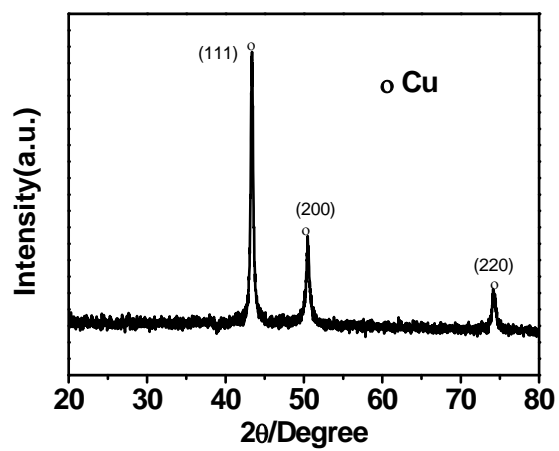

(b)

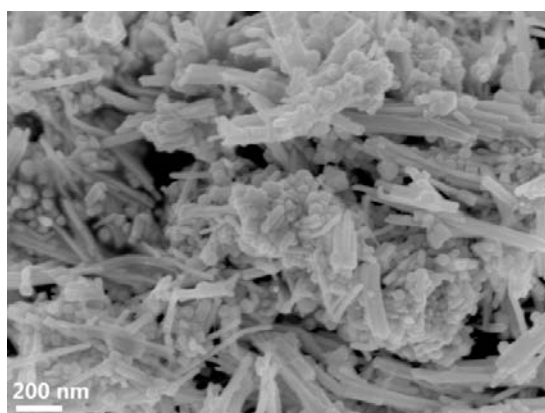

**Figure S10** XRD and SEM image of product obtained by heating CuCl in oleylamine at 250 °C for 10 min.

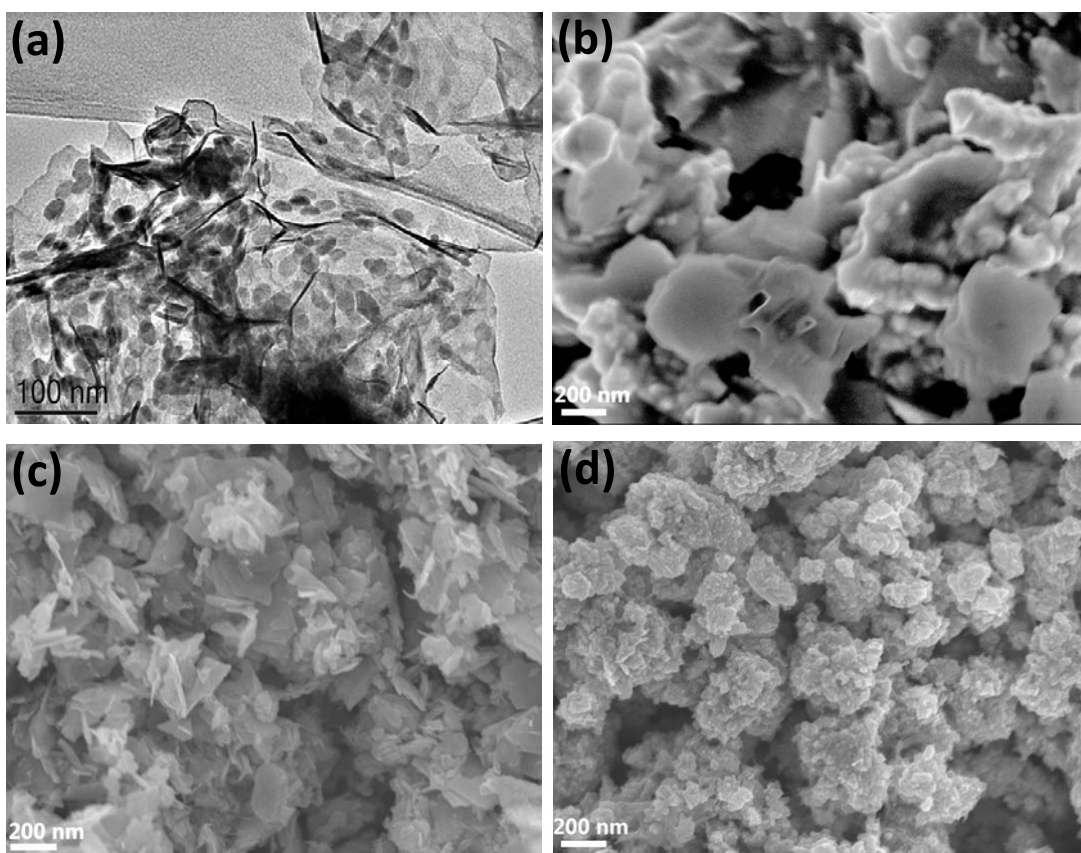

**Figure S11** Different  $\text{Cu}_{2-x}\text{Te}$  sheet structure synthesised under different temperatures and CuCl concentrations. (a) TEM of sample synthesised with 0.02 M CuCl at 230 °C; (b) sample obtained from 0.02 M CuCl at 270 °C; (c) sample synthesised with 0.05 M CuCl at 250 °C; (d) sample synthesised with 0.005 M CuCl at 250 °C.

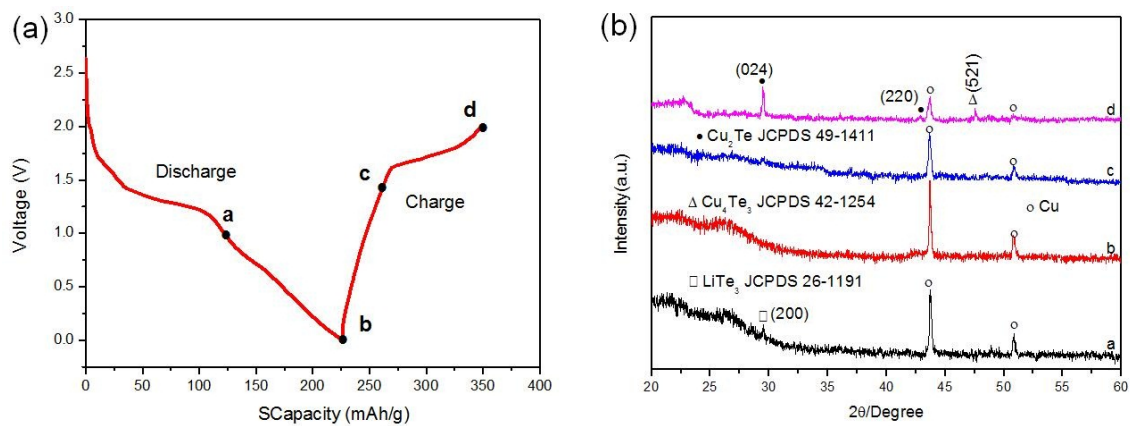

**Figure S12** Ex-situ XRD for Cu<sub>2-x</sub>Te electrodes stopped at different voltage plateaus: (a) voltage state of the plateaus; (b) ex-situ XRD for the 4 electrodes.

## 2. Synthesis of hollowed $\text{Cu}_{2-x}\text{Te}$ nanoparticles.

In order to investigate the effect of materials shapes on battery performance, hollowed  $\text{Cu}_{2-x}\text{Te}$  nanoparticles were synthesised as followed:  $\text{Cu}(\text{acac})_2$  (0.25 mmol), HDA (4.18 g), and TOP (2 ml) were loaded into a 100 ml three neck flask. After being degassed at 100 °C for 30 min, the mixture was heated to 250 °C under protection of Ar and a yellow copper precursor solution formed. The solution was kept at 250 °C for 10 min to let the temperature stable and the solution changed into brown, 125  $\mu\text{l}$ , 1 M TOPTe solution was swiftly injected into the copper precursor. The temperature of the copper precursor decreased no more than 1 °C and was kept at 250 °C for another 10 min, the solution turned into black. The product was purified by repeatedly precipitating and re-dispersing in ethanol and dichloromethane, respectively.
